# Supplementary material for: Proteomic searches comparing two (R)-lacosamide affinity baits: An electrophilic arylisothiocyanate and a photoactivated arylazide group
Source: Royal Society of Chemistry journal article supplement (doi:10.1039/c000987c), 2010-01-01

## **Supporting Information**

# **Proteomic Searches Comparing Two (*R*)-Lacosamide Affinity Baits: An Electrophilic Arylthiocyanate and a Photoactivated Arylazide Group**

Ki Duk Park,<sup>1</sup> James P. Stables,<sup>2</sup> Rihe Liu<sup>1,3,\*</sup> and Harold Kohn<sup>1,4,\*</sup>

<sup>1</sup>Division of Medicinal Chemistry and Natural Products, UNC Eshelman School of Pharmacy, University of North Carolina, Chapel Hill, North Carolina 27599-7568, USA

<sup>2</sup>Anticonvulsant Screening Program, National Institute of Neurological Disorders and Stroke, National Institutes of Health, 6001 Executive Blvd., Suite 2106, Rockville, MD 20892-9523, USA

<sup>3</sup>Carolina Center for Genome Sciences, University of North Carolina, Chapel Hill, North Carolina 27599-7264, USA

<sup>4</sup>Department of Chemistry, University of North Carolina, Chapel Hill, North Carolina 27599-3290, USA

### **CORRESPONDING AUTHOR FOOTNOTE**

Division of Medicinal Chemistry and Natural Products, UNC Eshelman School of Pharmacy, University of North Carolina, Chapel Hill, North Carolina 27599-7568 and Department of Chemistry, University of North Carolina, Chapel Hill, North Carolina 27599-3290, E-mail: [hkohn@email.unc.edu](mailto:hkohn@email.unc.edu), Telephone: 919-843-8112, Fax number: 919-966-0204

Division of Medicinal Chemistry and Natural Products, UNC Eshelman School of Pharmacy, University of North Carolina, Chapel Hill, North Carolina 27599-7568 and Carolina Center for Genome Sciences, University of North Carolina, Chapel

Hill, North Carolina 27599-7264, E-mail: [rliu@email.unc.edu](mailto:rliu@email.unc.edu), Telephone: 919-843-3635, Fax number: 919-966-0204

**Treatment of (*R*)-*N*-(4-azidobenzyl) 2-Acetamido-3-(prop-2-ynyloxy)propionamide ((*R*)-**3**) with TCEP.** A 100  $\mu$ M solution (10 mL) of (*R*)-*N*-(4-azidobenzyl) 2-acetamido-3-(prop-2-ynyloxy)propionamide ((*R*)-**3**) (0.32 mg, 1  $\mu$ mol) in 5% CH<sub>3</sub>CN aqueous 50 mM HEPES (pH 7.2) was treated with TCEP (1 mM) and then stirred at room temperature (15 – 60 min). The reaction solution was analyzed at various time intervals by TLC and HPLC using a photodiode array detector (210 – 340 nm). Samples (50  $\mu$ L) were injected onto a  $\mu$ Bondapak C-18 column (3.9  $\times$  300 mm, Waters Corp. Part No. WAT027324) (Figure S1). A gradient mobile phase (0/100 CH<sub>3</sub>CN/H<sub>2</sub>O – 50/50 CH<sub>3</sub>CN/H<sub>2</sub>O) was employed for 30 min using a flow rate of 1 mL/min; new product: TLC  $R_f$  = 0.35 (1/7 acetone/EtOAc), HPLC  $t_R$  9.7 min; (*R*)-**3**: TLC  $R_f$  = 0.50 (1/7 acetone/EtOAc), HPLC  $t_R$  15.5 min.

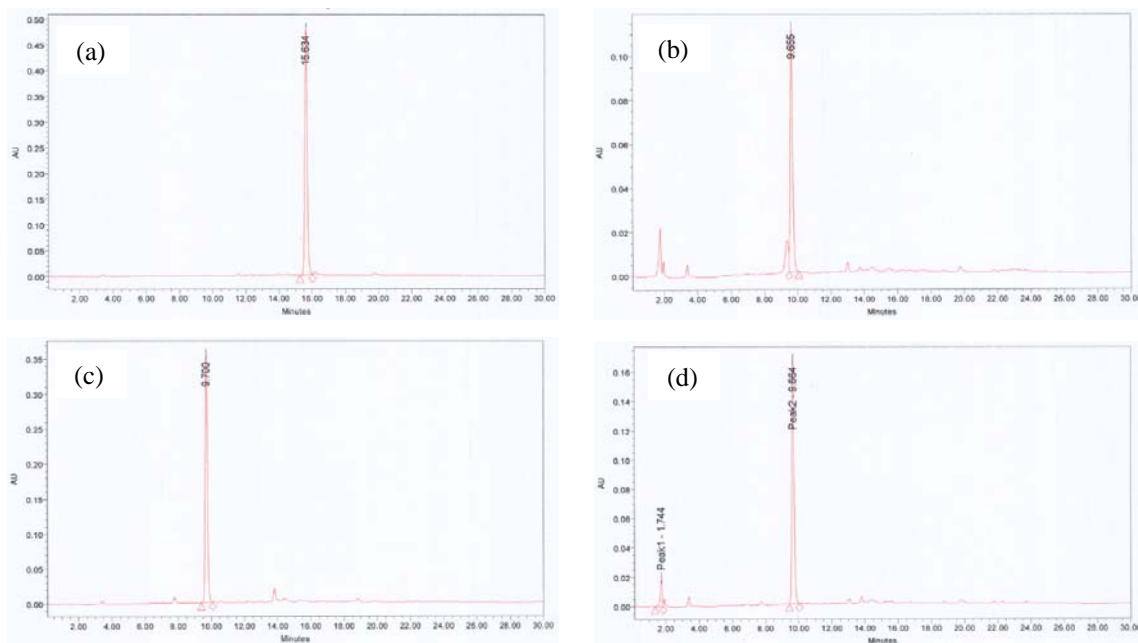

Figure S1. Treatment of (*R*)-*N*-(4-azidobenzyl) 2-acetamido-3-(prop-2-ynyloxy)propionamide ((*R*)-**3**) with TCEP (10 equiv): (a) (*R*)-**3**; (b) Reaction of (*R*)-**3** with TCEP after 30 min; (c) (*R*)-*N*-(4-aminobenzyl) 2-acetamido-3-(prop-2-ynyloxy)propionamide ((*R*)-**16**); (d) Co-injection of the reaction of (*R*)-**3** with TCEP after 30 min with (*R*)-**16**.

**AB&CR 3 Labeling of GST-CRMP2 in Mouse Lysate, Cycloaddition, and In-Gel Fluorescence Scanning.** Utilizing the method described in the paper, lysate aliquots (150  $\mu\text{L}$ , pH 7.8) were prepared after passage through a Nap-10 column. Overexpressed GST-CRMP2 (30 or 45  $\mu\text{g}$ ) was added to the lysate (150  $\mu\text{L}$ ) and the resulting mixture was divided into three equal aliquots. The aliquots (50  $\mu\text{L}$ ) were treated with either (*R*)-**3** or (*S*)-**3** (10  $\mu\text{M}$ ) without or with competing ligands ((*R*)-**1**, (*S*)-**1**) at 4 °C (10 min), and irradiated with 312 nm light (8 W, Spectroline EB-280C, Spectronics Corp., New York, USA) at 4 °C (2 min). The reaction mixtures were treated with TCEP (1 mM) for quenching of the remaining azide compound. The modified lysates were sequentially treated with rhodamine reporter tag (rhodamine-azide (Rho-N<sub>3</sub>) (50  $\mu\text{M}$ )), TBTA (100  $\mu\text{M}$ ) and CuSO<sub>4</sub> (1 mM). Samples were mixed by rotating using Roto-shake (8 rpm, Scientific Industries Inc., Model No. SI-1100, Bohemia, NY) at room temperature (1 h). Proteins were separated by SDS-PAGE after addition of 4× SDS-PAGE loading buffer and visualized by in-gel fluorescence using a typhoon 9400 scanner (Amersham Bioscience) with excitation at 532 nm and detection at 580 nm.

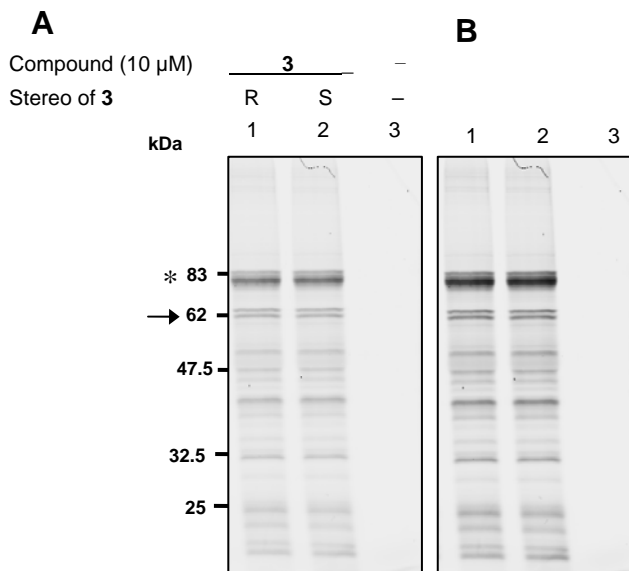

Figure S2. *In vitro* labeling of externally added GST-CRMP2 and endogenous CRMP2 (marked by an arrow) in mixture of mouse lysate and overexpressed GST-CRMP2 (marked by an asterisk).

Figure S2A; **3**-labeled proteins were detected by in-gel fluorescence scanning after Cu(I)-mediated cycloaddition with **6**. Figure S2B; All **3**-labeled proteins in Figure S2A were detected by higher intensity of in-gel fluorescence scanning.

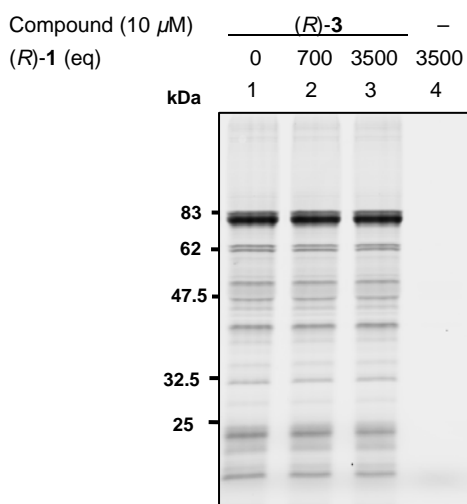

Figure S3. Competition experiments using *(R)*-**3** with excess *(R)*-**1** in the mouse lysate supplemented with overexpressed GST-CRMP2.

**Glutathione (GSH) Effect on Cu(I)-mediated Cycloaddition.** Mouse brain lysate (1 mL, 50 mM HEPES buffer (pH 7.4)) was passed through a Nap-10 column (GE Healthcare) to exchange buffer to an aqueous 50 mM HEPES buffer (pH 7.8). Lysate aliquots (200  $\mu$ L of 2.0 mg/mL protein in 50 mM HEPES buffer (pH 7.8)) were treated with (*R*)-**3** (10  $\mu$ M) at 4 °C (10 min) and irradiated with 312 nm light (8 W, Spectroline EB-280C, Spectronics Corp., New York, USA) at 4 °C (5 min). The reaction mixtures were treated with TCEP (1 mM, room temperature, 20 min) for quenching of the remaining azide compound. The modified lysate was divided into 4 equal aliquots and treated with 0, 0.1, 0.5 and 2.5 mM of GSH, respectively. Samples were sequentially treated with rhodamine reporter tag (rhodamine-azide (Rho-N<sub>3</sub>) (50  $\mu$ M)), TBTA (100  $\mu$ M) and CuSO<sub>4</sub> (1 mM) and shaken using Roto-shake (8 rpm, Scientific Industries Inc., Model No. SI-1100, Bohemia, NY) at room temperature (1 h). Proteins were separated by SDS-PAGE after addition of 4 $\times$  SDS-PAGE loading buffer and visualized by in-gel fluorescence using a typhoon 9400 scanner (Amersham Bioscience) with excitation at 532 nm and detection at 580 nm.

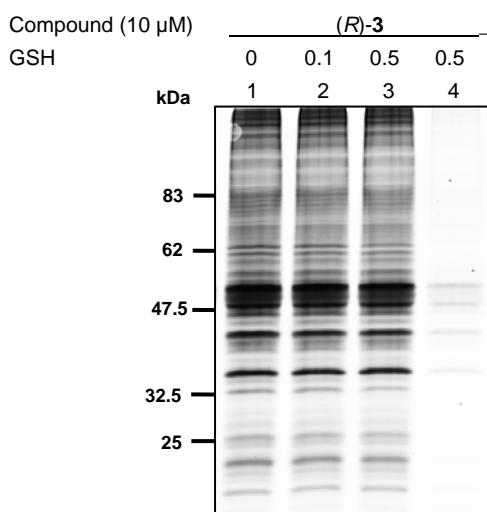

Figure S4. Glutathione (GSH) effect on Cu(I)-mediated cycloaddition.

Table S1. Relative intensities of CRMP2 and other proteins in Figure 2.

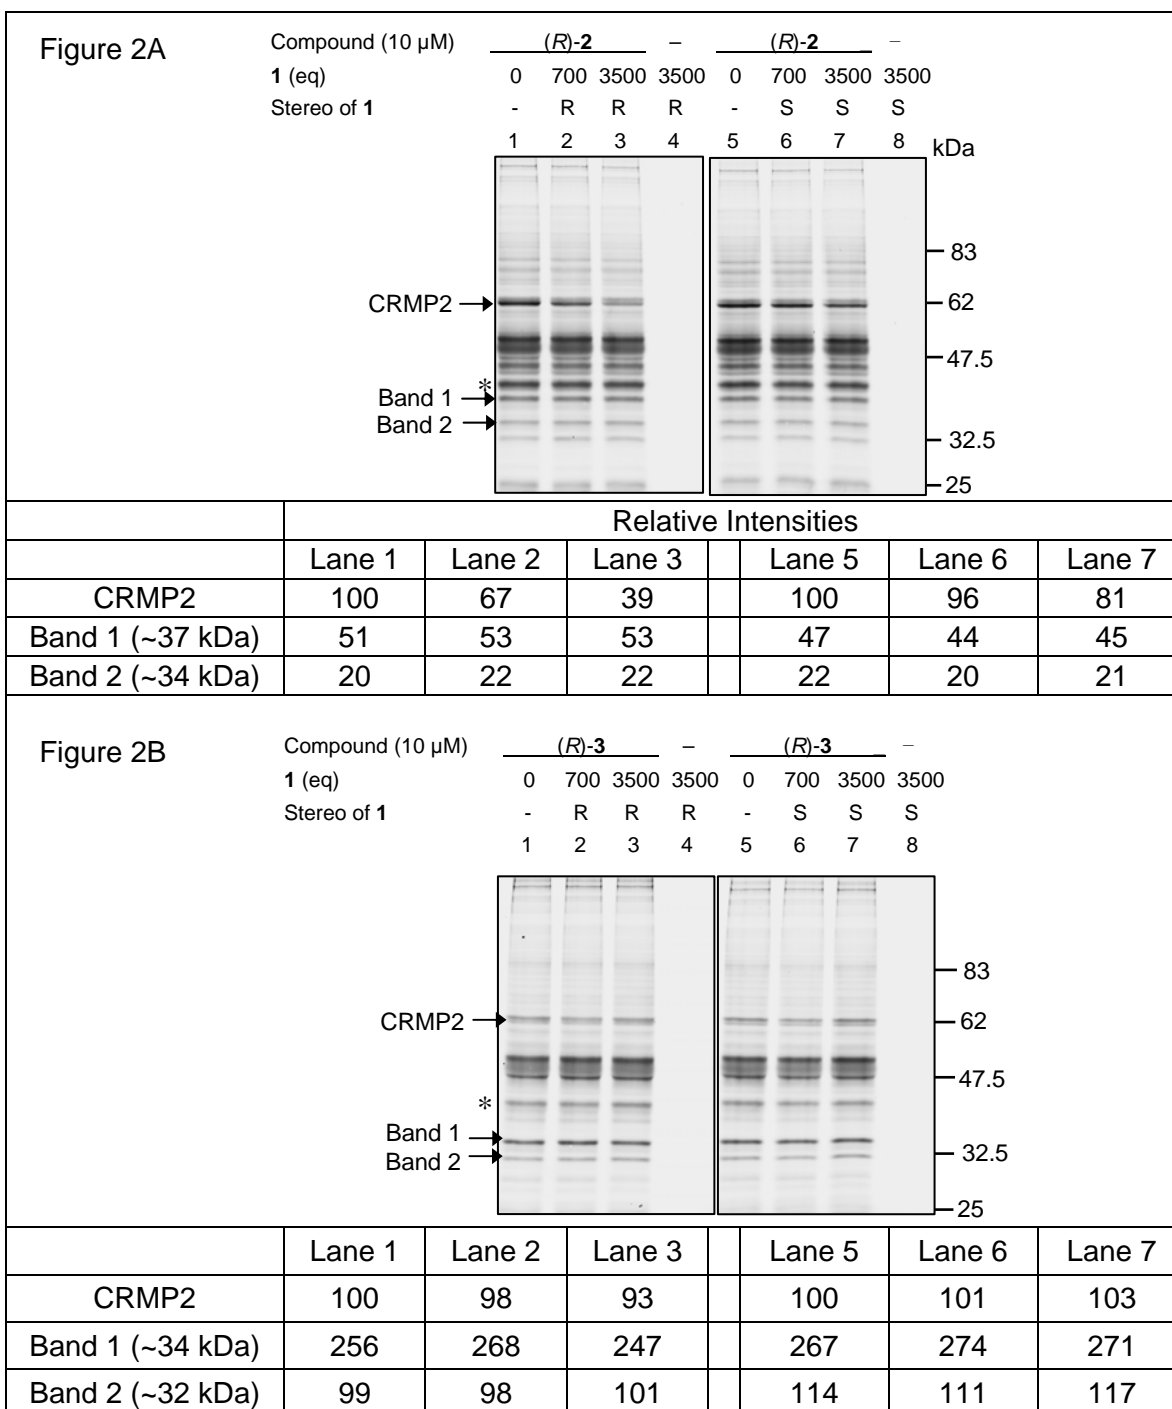

All relative intensities are calculated after normalization using an internal standard protein band (~40 kDa, asterisk). CRMP2 band in the first lane of each gel is given a value of 100.

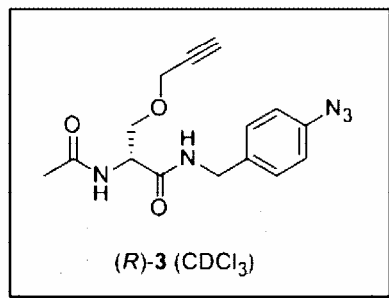

W: Water  
X: Impurity  
S: Solvent

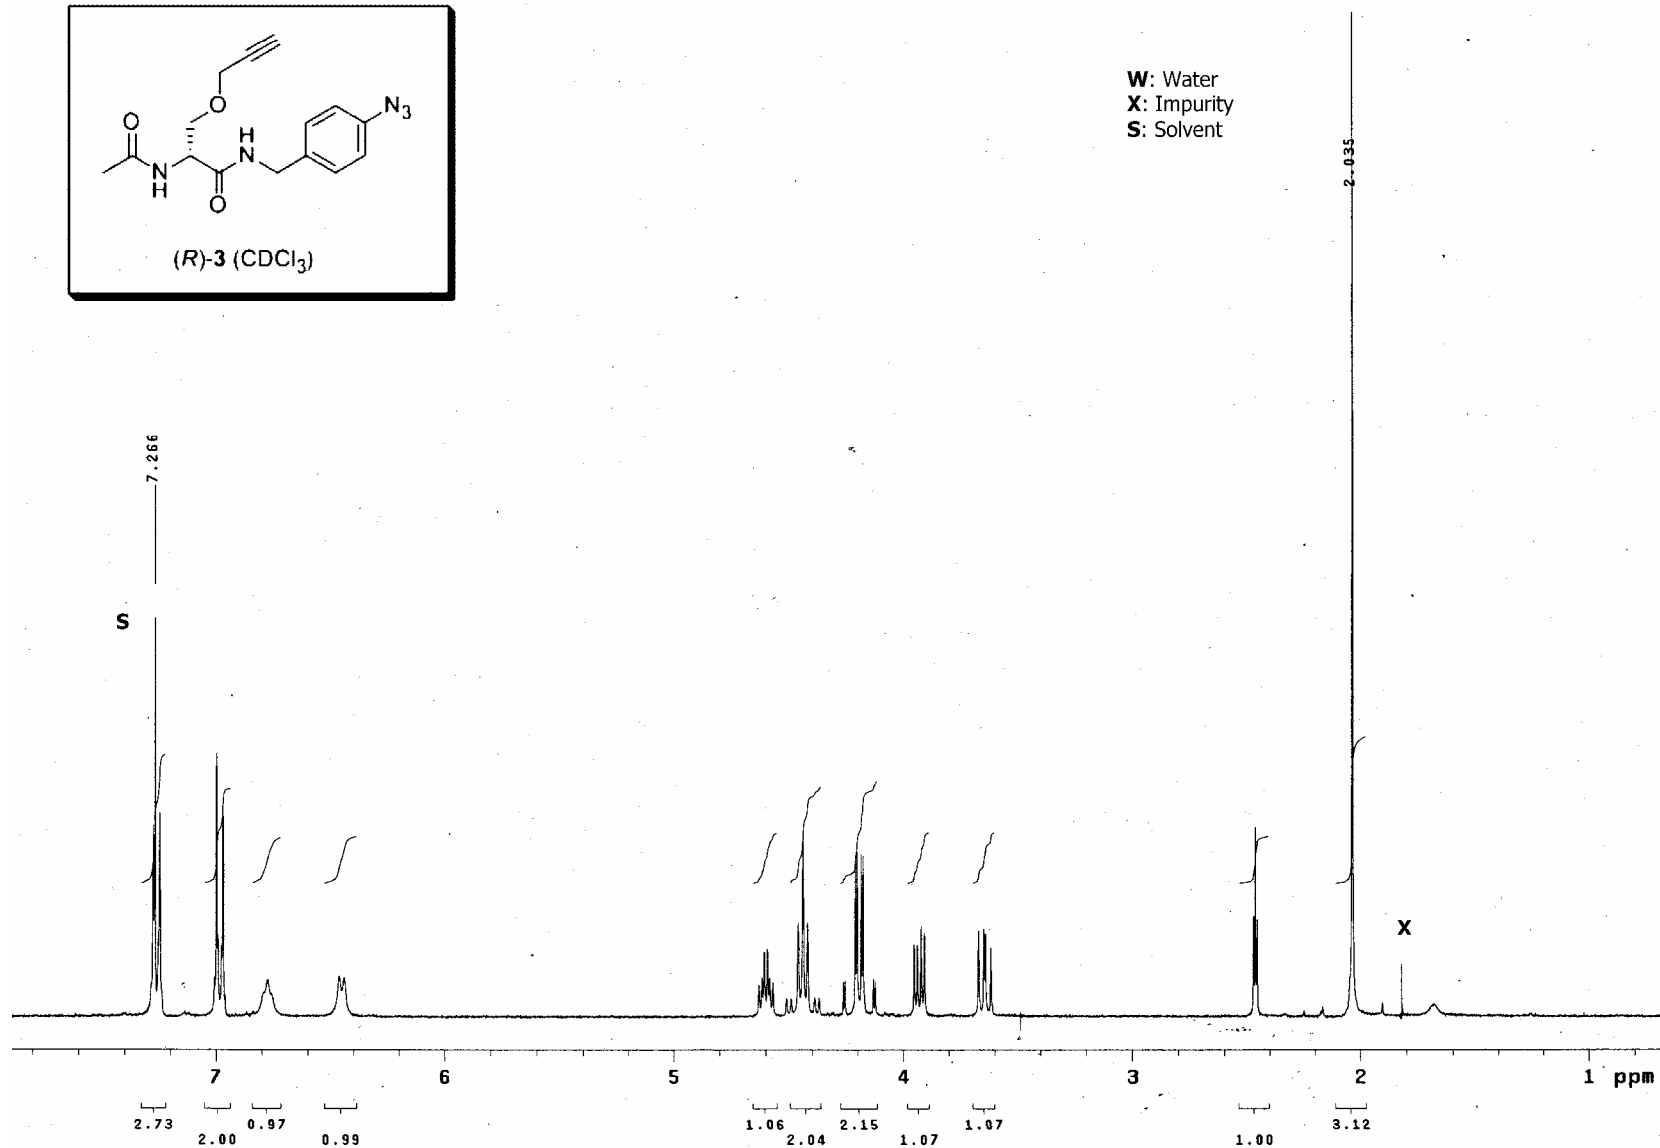



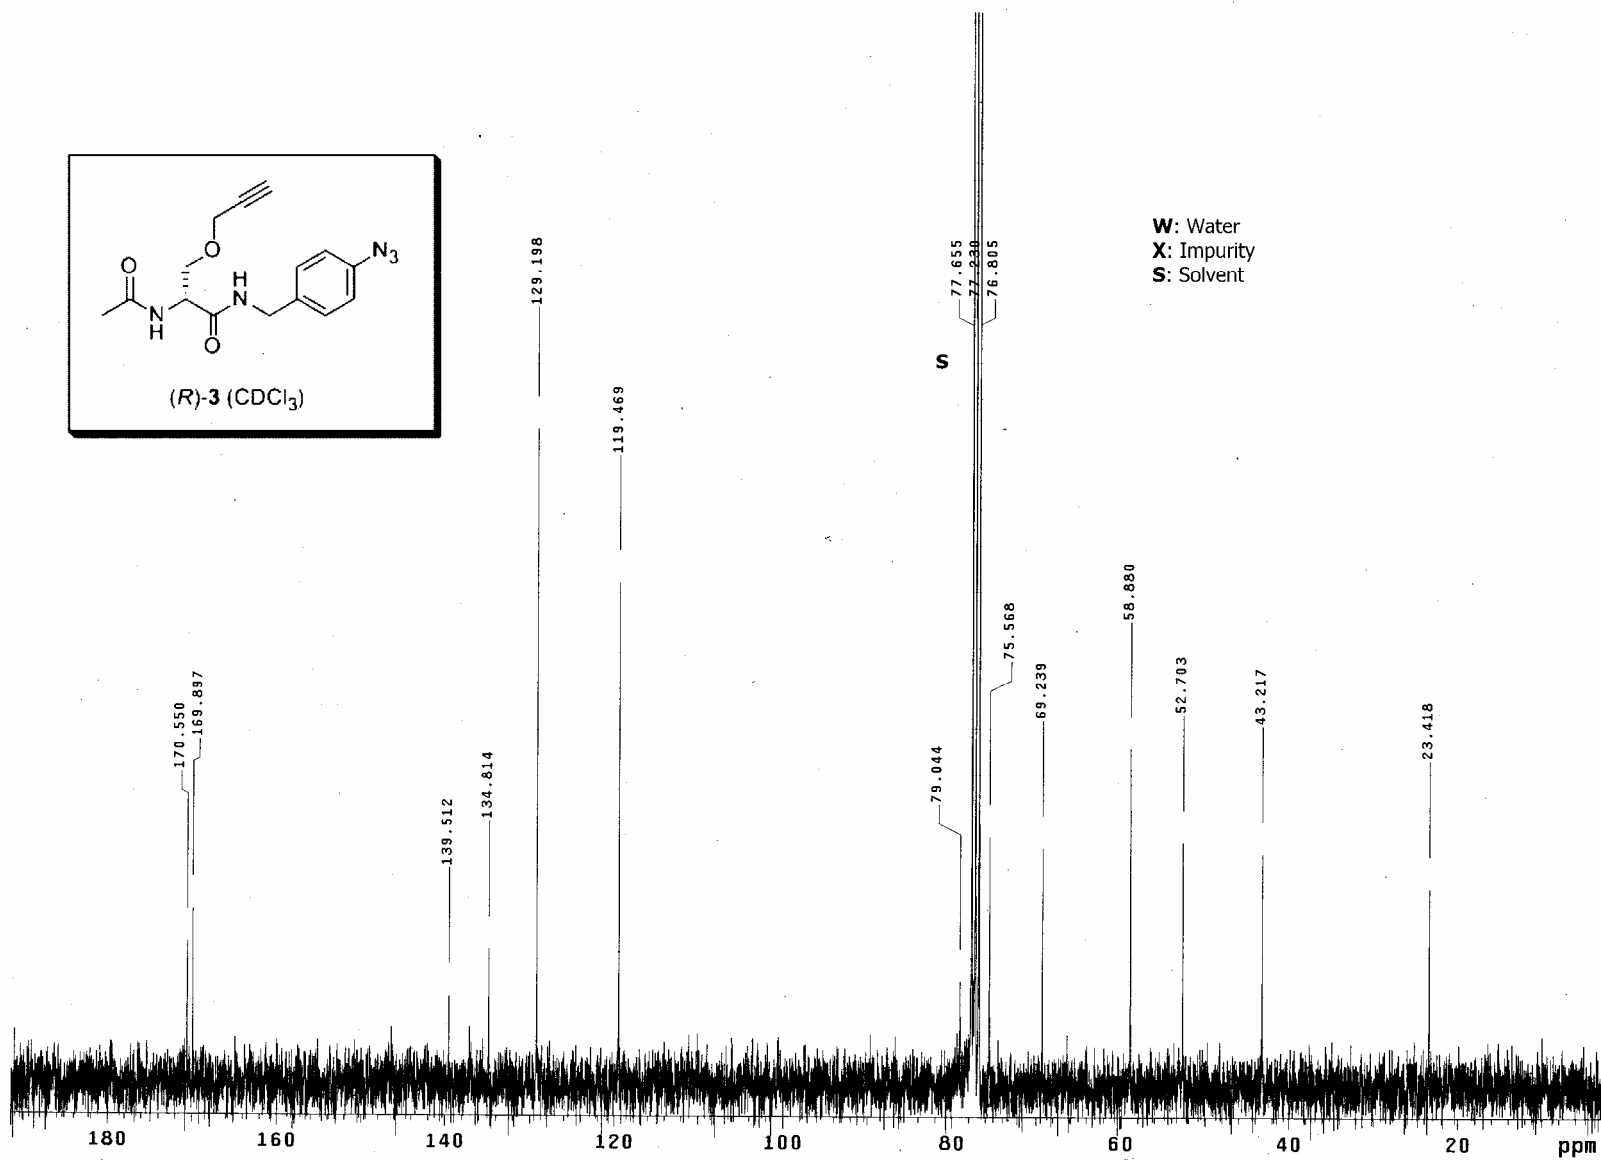

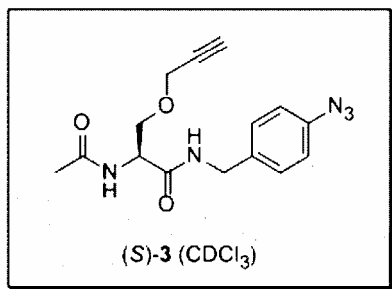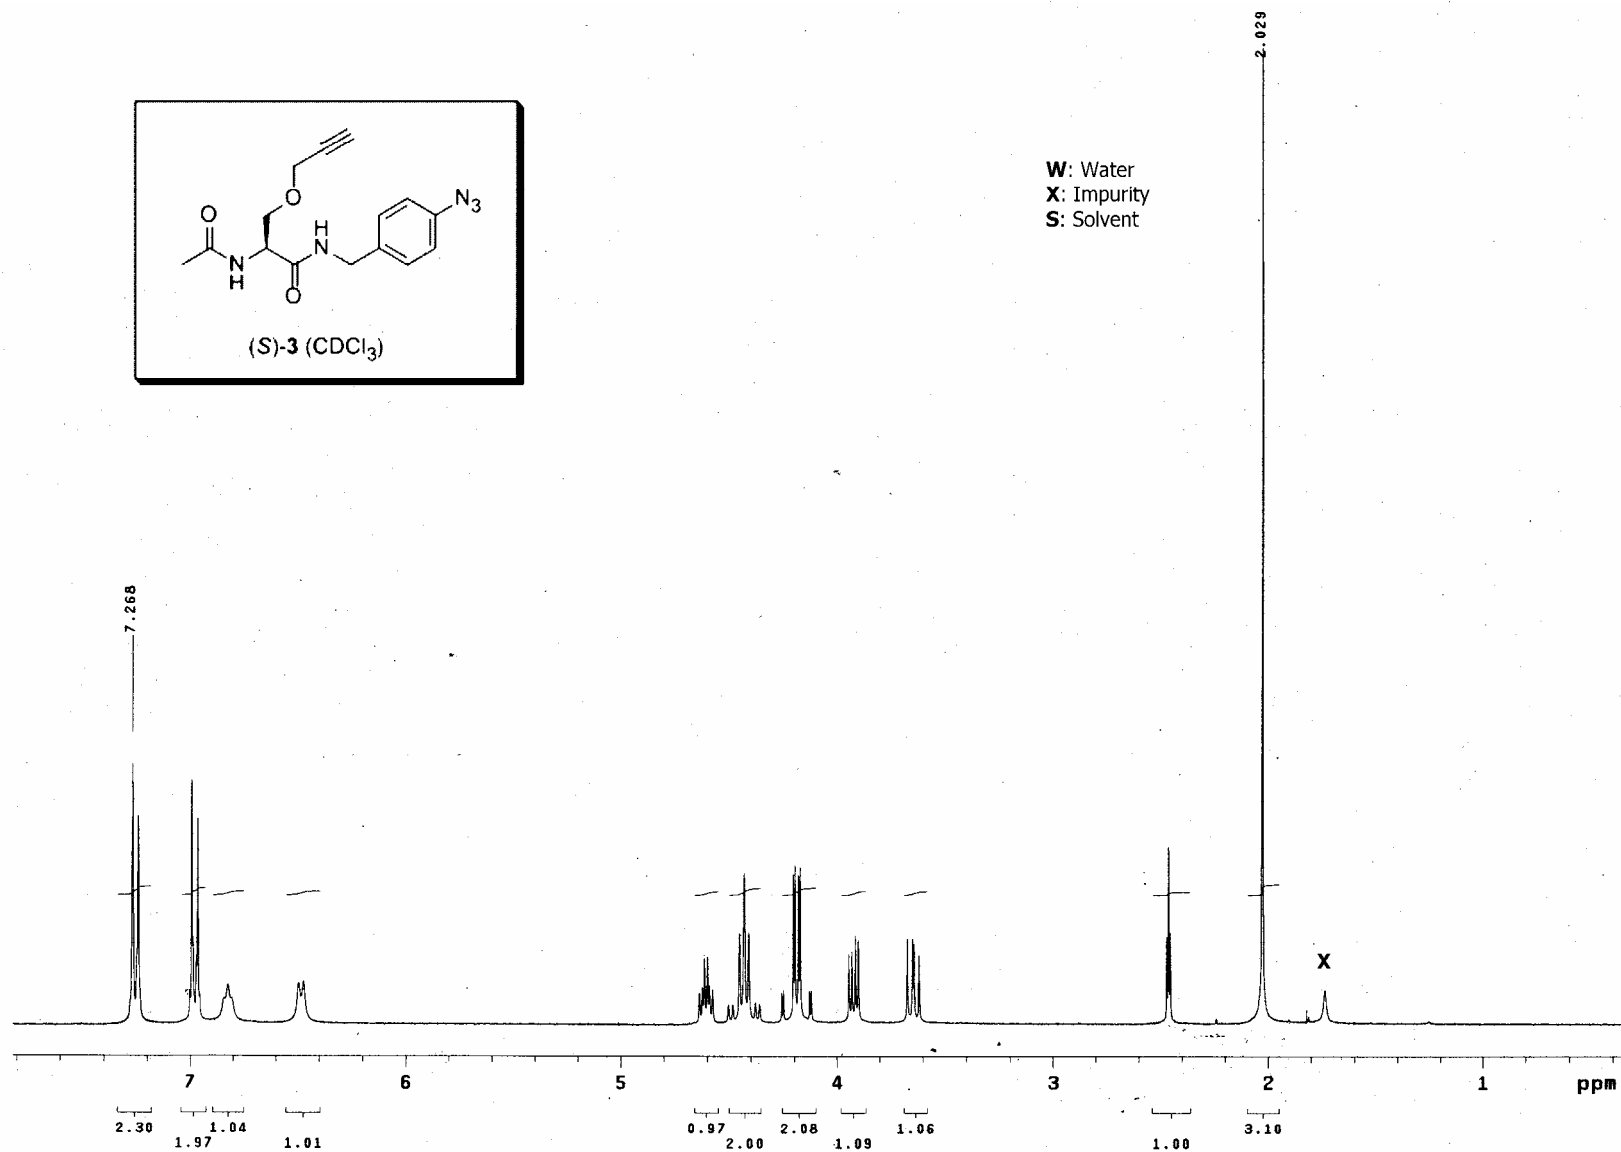

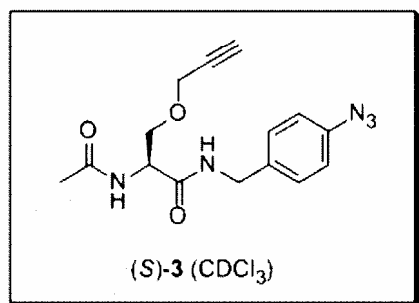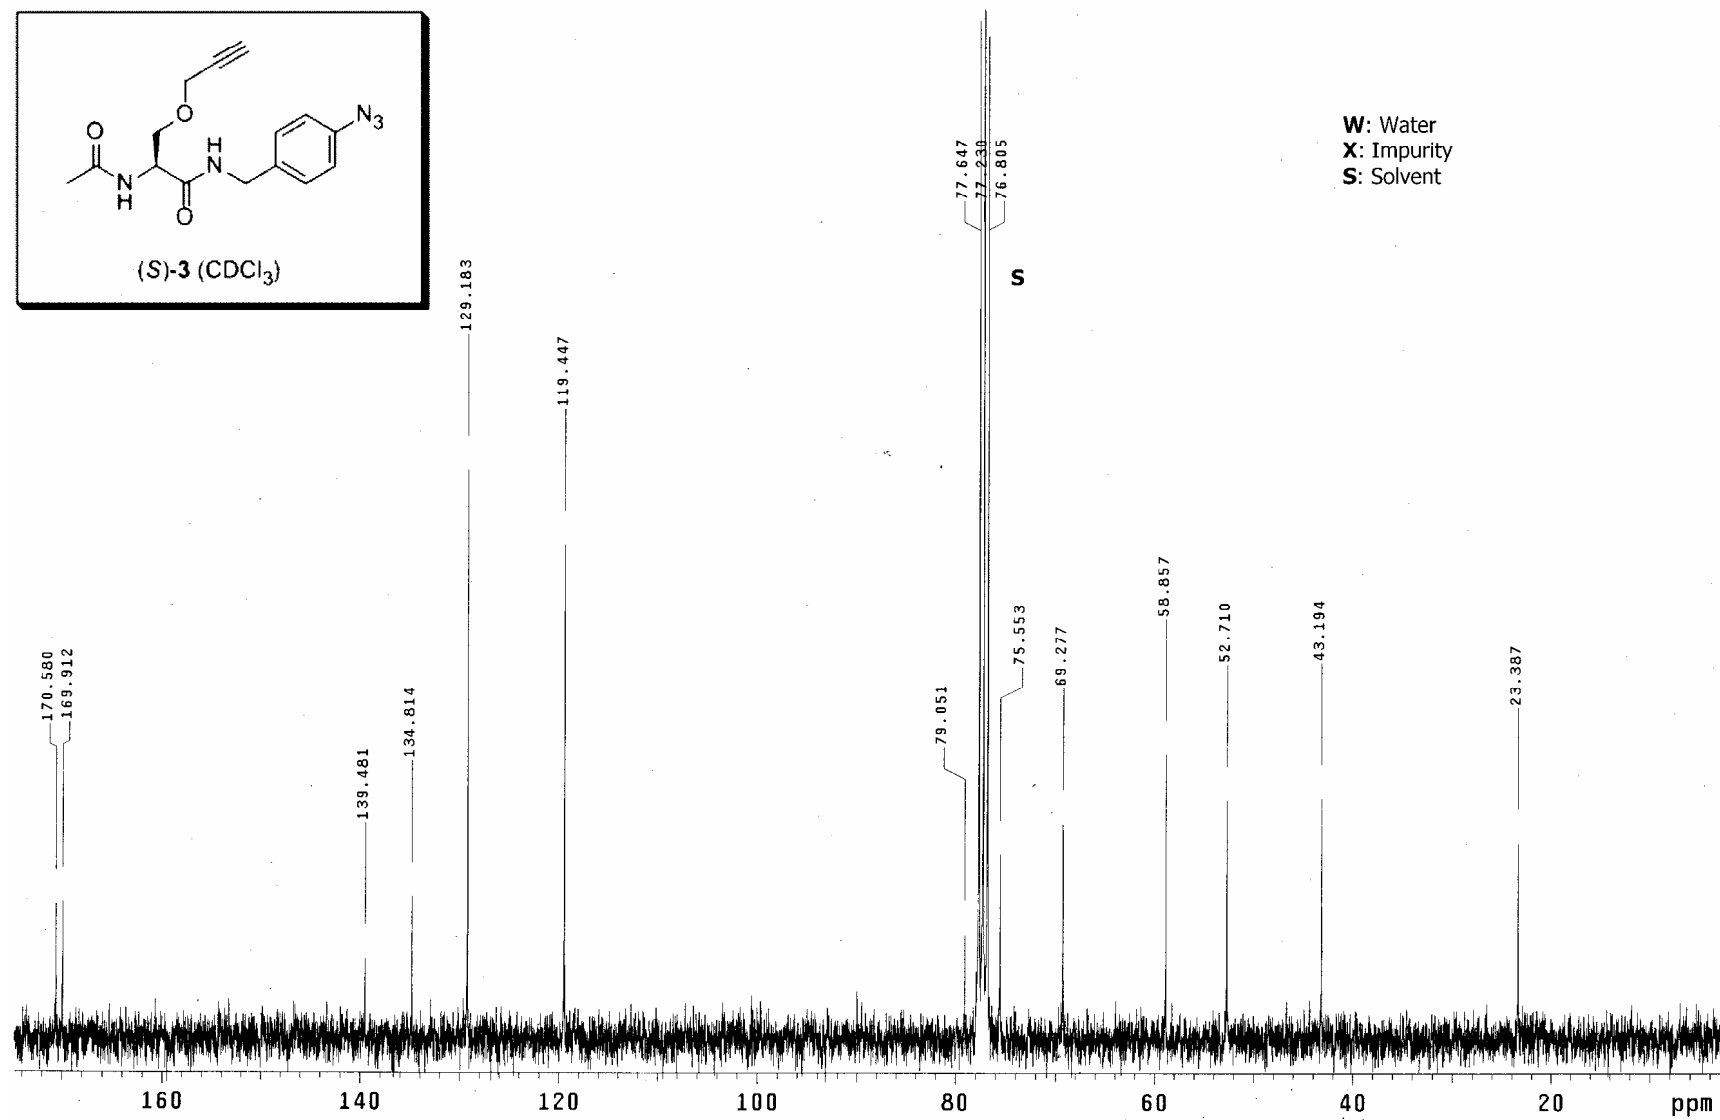

Supplement: c000987c.pdf [file c000987c.pdf]
